## Correction: An updated meta-analysis of the prognostic value of decreased E-cadherin expression in ovarian cancer

LiLi Yu<sup>1</sup>, Xiaoli Hua<sup>2</sup>, Yu Yang<sup>2</sup>, Ke Li<sup>2</sup>, Qilin Zhang<sup>2</sup> and Lixiu Yu<sup>2</sup>

<sup>1</sup> Department of Obstetrics and Gynecology, Union Hospital, Tongji Medical College, Huazhong University of Science and Technology, Wuhan 430022, China

<sup>2</sup> Department of Pharmacy, Union Hospital, Tongji Medical College, Huazhong University of Science and Technology, Wuhan 430022, China

**Published:** April 13, 2018

**Copyright:** Yu et al. This is an open-access article distributed under the terms of the Creative Commons Attribution License 3.0 (CC BY 3.0), which permits unrestricted use, distribution, and reproduction in any medium, provided the original author and source are credited.

**This article has been corrected:** The correct author affiliations are given below:

<sup>1</sup> Department of Obstetrics and Gynecology, Union Hospital, Tongji Medical College, Huazhong University of Science and Technology, Wuhan 430022, China

<sup>2</sup> Department of Pharmacy, Union Hospital, Tongji Medical College, Huazhong University of Science and Technology, Wuhan 430022, China

Original article: Oncotarget. 2017; 8:81176-81185. <https://doi.org/10.18632/oncotarget.20885>
